# Supplementary material
Source: bioRxiv or medRxiv preprint supplement (https://www.biorxiv.org/content/biorxiv/early/2021/02/23/2021.02.01.429082/DC1/embed/media-1.pdf)
Supplement: Supplementary file [file media-1.pdf]

1 **Supplementary Information**

2 Cubam receptor-mediated endocytosis in the hindgut-derived pseudoplacenta of a viviparous teleost

3 *Xenotoca eiseni*

4

5 Atsuo Iida, Kaori Sano, Mayu Inokuchi, Jumpei Nomura, Takayuki Suzuki, Mao Kuriki, Maina Sogabe, Daichi

6 Susaki, Kaoru Tonosaki, Tetsu Kinoshita, Eiichi Hondo

7

8 **Correspondence:** Atsuo Iida

9 **E-mail:** [tol2.4682@gmail.com](mailto:tol2.4682@gmail.com)

10

11 **This PDF file includes:**

12           Figures S1 to S6

13           Tables S1 to S7

14

15 **Other supplementary materials for this manuscript include the following:**

16           Dataset S1

17 **Additional Figures**

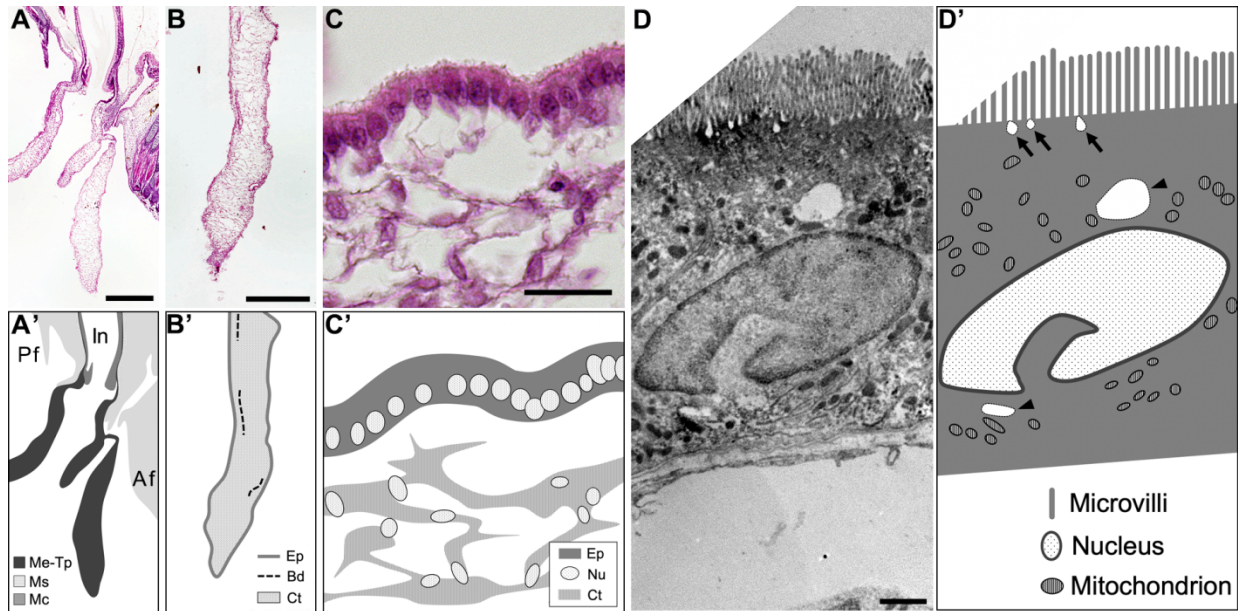

18  
19 **Figure S1. Tissue structures of the trophotaenia in *Xenotoca eiseni* embryos.**

20 **A-A'**. Hematoxylin and eosin (HE)-stained section (A) and corresponding illustration (A') of the tissue  
 21 structure around the anus at the border of the hindgut and trophotaenia of the embryo at the fourth  
 22 gestational week. Trophotaeniae are sequential to the mesenchymal layer of the intestine. In, intestine; Pf,  
 23 pelvic fin; Af, anal fin; Me-Tp, mesenchyme-to-trophotaenia; Ms, muscle layer; Mc, mucosal layer. Scale  
 24 bar: 500  $\mu\text{m}$ . **B-B'**. HE-stained section (B) and corresponding illustration (B') of the internal structure of the  
 25 trophotaenia. Ep, epithelial layer cells; Bd, blood vessel; Ct, connective tissue. Scale bar: 500  $\mu\text{m}$ . **C-C'**.  
 26 Enlarged image of the HE-stained section (C) and corresponding illustration (C') of the epithelial layer of the  
 27 trophotaenia. Ep, epithelial layer; Nu, nucleus; Ct, connective tissue. Scale bar: 20  $\mu\text{m}$ . **D-D'**. Electron  
 28 microscopy (D) and corresponding illustration (D') of an epithelial layer cell of the trophotaenia. Microvilli  
 29 are distributed on the apical surface of the cells. Arrows indicate endocytic vesicles during the invagination  
 30 phase. Arrowheads indicate intracellular vesicles after endocytosis. Scale bar: 1  $\mu\text{m}$ .

31

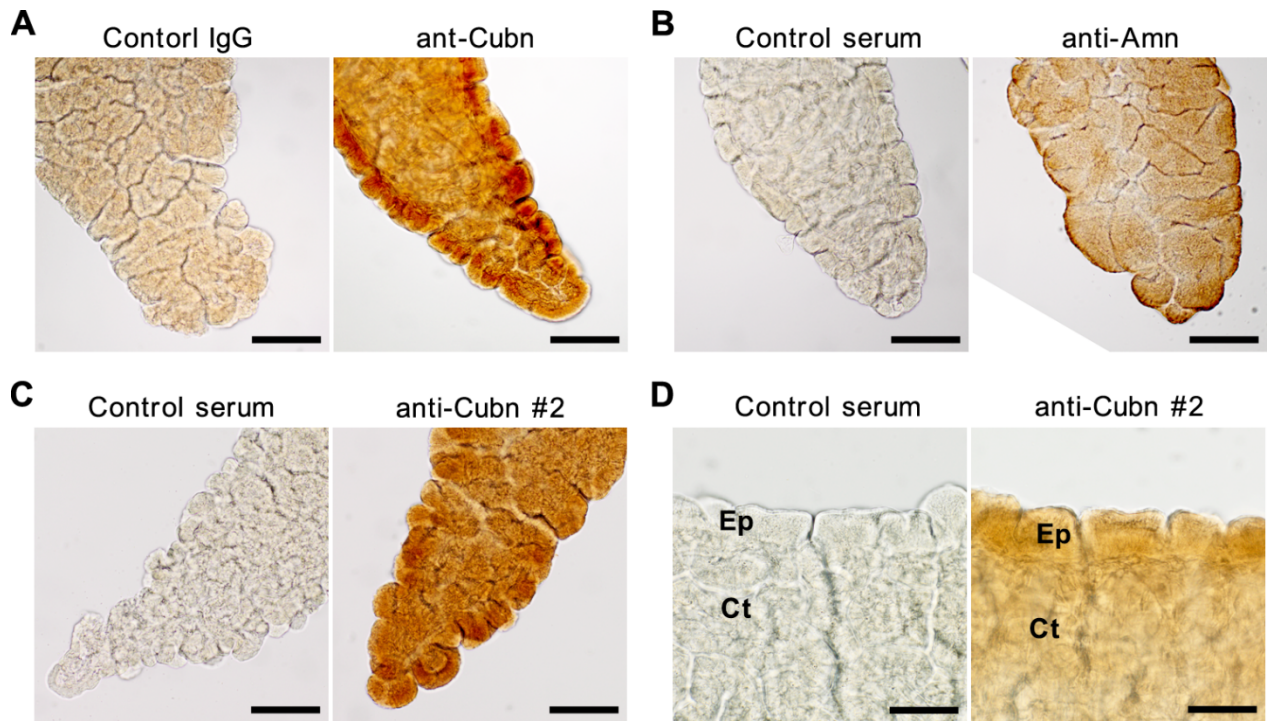

32

33

**Figure S2. Immunohistochemistry of Cubn or Amn in the trophotaenia.**

34

**A-B.** Immunohistochemistry using the Cubn antibody (A) or Amn antiserum (B) in the apical terminal of the

35

trophotaenia. Scale bar: 100  $\mu$ m. **C-D.** Immunohistochemistry using the Cubn antiserum in the apical

36

terminal (C) or the epithelial layer (enlarged image) (D) of the trophotaenia. Ep, epithelium layer; Ct,

37

connective tissue. Scale bar: 100  $\mu$ m (C) or 50  $\mu$ m (D).

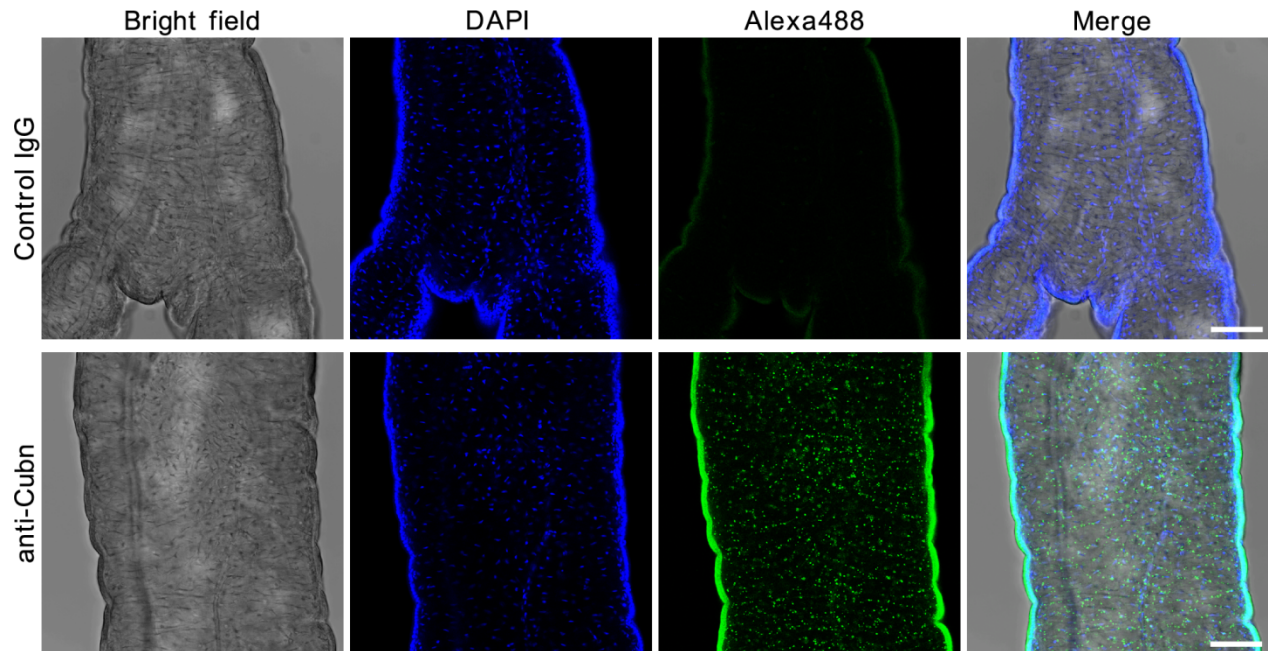

38

39 **Figure S3. Fluorescent immunohistochemistry using Cubn antibody in the trophotaenia.**

40 Confocal microscopy analysis of the trophotaenia of *Xenotoca eiseni* embryos at the fourth week of  
 41 gestation. Anti-Cubn signals are observed in the epithelial layer cells of the trophotaenia. DAPI, 4',6-  
 42 diamidino-2-phenylindole. Scale bar: 20  $\mu$ m.

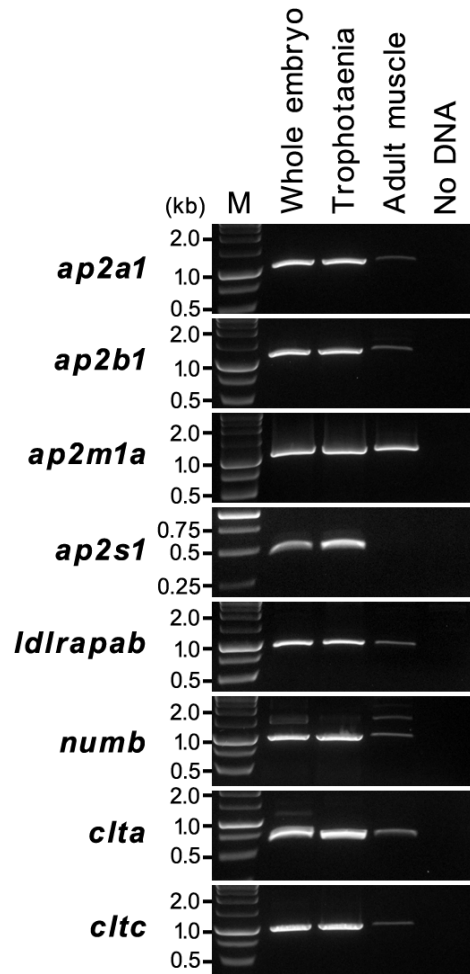

43

44 **Figure S4. Gene expression analysis of the endocytic adaptor and vesicle coating proteins in the**  
 45 **respective tissues.**

46 M, marker.

```

H.sapiens DAB2 (NP_001334.2) MSNEVETSATN-GQPDQ-----QAAPKAPSKKEKKKGPEK 34
X.eiseni dab2 MSTEVENSVPATADPSSPSTASTTISPTTSPVTTTPKAQLKKEKKKVPEK 50
**.*.*.*.*. .:.*. :;*** ***** **

H.sapiens DAB2 (NP_001334.2) TDEYLLARFKGDGVKYKAKLIGIDDVDPARGDKMSQDSMMKLGMAAAGR 84
X.eiseni dab2 TDEYLLSRFQGDGVRVKAKLIGIDDVSEARGDKMCQDSMMKLGMAVAAR 100
*****;*:****;*****. :;*****.*****.*.*

H.sapiens DAB2 (NP_001334.2) SQGQHKQRIWVNIISLGGIKIIDEKTGVIEHEHPVNKISFIARDVTDNRAF 134
X.eiseni dab2 SQGKHKQRIWVNIISMSGLKIIDKSGVIEHEHVVNKISFIARDVTDNRAF 150
***;*****;*:****;***** *****

H.sapiens DAB2 (NP_001334.2) GYVCGEGEQHQFFAIKTGQQAEPVVDLKDLPQVIYNVKKKEEK-KKIE 183
X.eiseni dab2 GYVCGAEGQHQFFAIKTAQQAEPVIDLKDLPQVIFNMRKKEAESSQKAE 200
*****.*****.*****;*****;*:*** *.*

H.sapiens DAB2 (NP_001334.2) EASKAVENGSEALMILDQTNKLSGVDQMDLFGDMSTPPDLNSPTESKD 233
X.eiseni dab2 NGSAVVENG-ALQSTDGES-KAAQPVEQLDLFGDITTPDIRAP----- 243
:. * .****. ** *.: * .*:*****;*****.:*

H.sapiens DAB2 (NP_001334.2) ILLVDLNSIEDTNQNSLRENPFLLTNGITSCSLRPTPQASFLPENAFSAN 283
X.eiseni dab2 -----

H.sapiens DAB2 (NP_001334.2) LNFPPPTPNPDPFRDDPFTQPDQSTPSSFDLSKSPDKKENSSSSSTPLSN 333
X.eiseni dab2 -----NSGSS----- 248
**.*

H.sapiens DAB2 (NP_001334.2) GPLNGVDVDFGQQFDQISNRTGKQEAQAGPWFSSSQTPAVRTQNGVSE 383
X.eiseni dab2 -----

H.sapiens DAB2 (NP_001334.2) REQNGFSVKSSPNPFGVSPKGLSIQNGVKQDLESSVQSSPHDSIAIIPP 433
X.eiseni dab2 -----

H.sapiens DAB2 (NP_001334.2) PQSTKPGRRRTAKSSANDLLASDIFAPPVSEPSGQASPTGQPTALQPNP 483
X.eiseni dab2 -----DLFGTDLFVPPVS-----SETSPADLFNNTP 274
**.:**:*.*.* * . . .:.*

H.sapiens DAB2 (NP_001334.2) LDLFKTSAPAPVGLVGLGGVTTLPQAGPWNTASLVFNQSPSPMAPGAMM 533
X.eiseni dab2 TINTVPSTIPALG--SLQLGPTATSVPVAVGMWGTSPAVPAMFP--MPGIVT 320
. . :. ** : ** .:.*.* * *.*. * * ** :

H.sapiens DAB2 (NP_001334.2) GGQPSGFSQPVIFFT--SPAVSGWNQSPFAASTPPPVPVWGPSASVAP 581
X.eiseni dab2 PGLRPNFPQPTAFGVPMQPPVWAPQVVPQFSAAPLSPPHLQWGPATS-- 368
* .*.**.*. *. *.* . : .*:.*.* : **.*:

H.sapiens DAB2 (NP_001334.2) NAWSTTSPPLGNPFQSNIFPAPAVSTQPPSMHSSLLVTPPQPPPRAGPPKD 631
X.eiseni dab2 -----NPFQ-----AMGDHGSRP-----PPRPPVKETPPR- 394
*** *.: ** **:* : **

H.sapiens DAB2 (NP_001334.2) ISSDAFTALDPLGDKEIKDVKEMFKDFQLRQPPAVPARKGEQTSSTLS- 680
X.eiseni dab2 VENSFAFTALDPLGDKEKKTGKDMFKNFQIAKLPAIPARKGELMPSTPPP 444
:..***** * *:*:*:* : **:*:* *.*.

H.sapiens DAB2 (NP_001334.2) -----AFASYFNKSVGIPQENADHDDFDANQL-LNKINEPPKAPRQVS 723
X.eiseni dab2 ANKESVPFDEYFSNKVGLAQDAADHDDFDINQMSILDGNDAPKQTPVQFT 494
.* .*.***.*: ***** **: : .*.**.* *.*:

H.sapiens DAB2 (NP_001334.2) LPVTKS-----TDNAFENP-----FFKDSFGSSQASV 750
X.eiseni dab2 APAAAPSFPTDLLDAAFSSAPVFNSSAPTLGQDLSDHMFDAQFAGAPDNP 544
*.: . * **.. :*.:**.:..

H.sapiens DAB2 (NP_001334.2) ASSQPVS-----EMRYDPFGNPFA 770
X.eiseni dab2 FGAPPVAMNTVAQTSGSTDAFGDAFNGPFA 574
.: **: : :*.*****

```

47  
48 **Figure S5. Amino acid sequence alignment for *Homo sapiens* (*H. sapiens*) DAB2 and *Xenotoca eiseni***  
49 **(*X. eiseni*) dab2-like proteins.**



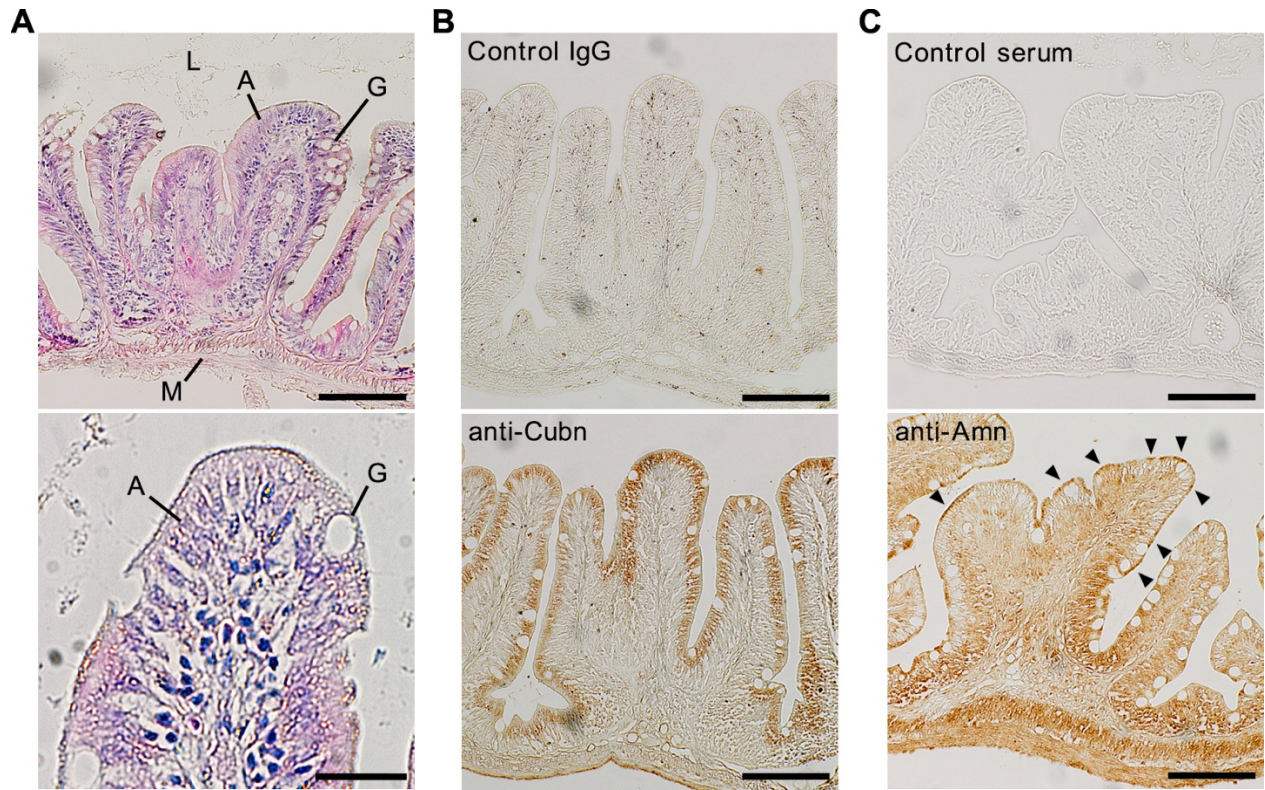

50  
 51 **Figure S6. Immunohistochemistry of Cubn or Amn in the adult intestine of *Xenotoca eiseni*.**  
 52 **A.** Hematoxylin and eosin-stained section of the hindgut of an adult female. The lower panel is an  
 53 enlarged image of an intestinal villus. A, absorbent epithelium; G, goblet cell; L, intestinal lumen; M,  
 54 muscularis mucosae. Scale bar: 100  $\mu\text{m}$  (upper) and 20  $\mu\text{m}$  (lower). **B.** Immunohistochemistry using the  
 55 Cubn antibody or control IgG. Scale bar: 100  $\mu\text{m}$ . **C.** Immunohistochemistry using the Amn antiserum or  
 56 control serum. Arrowheads indicate signal in the apical surface of the absorbent epithelium. Scale bar:  
 57 100  $\mu\text{m}$ .

58 **Additional Tables**

|                    |                | <i>cubn</i> | <i>amn</i> | <i>lrp1aa</i> | <i>lrp2a</i> |
|--------------------|----------------|-------------|------------|---------------|--------------|
| <b>Third week</b>  | #1             | 1421        | 745        | 6             | 12           |
|                    | #2             | 768         | 966        | 4             | 6            |
|                    | #3             | 1414        | 1269       | 10            | 10           |
|                    | <b>Average</b> | <b>1201</b> | <b>993</b> | <b>7</b>      | <b>9</b>     |
| <b>Fourth week</b> | #1             | 1528        | 1139       | 14            | 12           |
|                    | #2             | 1464        | 818        | 10            | 7            |
|                    | #3             | 1250        | 1032       | 8             | 12           |
|                    | <b>Average</b> | <b>1414</b> | <b>996</b> | <b>11</b>     | <b>10</b>    |

59 **Table S1. The transcripts per million (TPM) values for endocytic receptor genes in the RNA-seq**  
 60 **analysis.**



|                    |                | <i>ap2a1</i> | <i>ap2b1</i> | <i>ap2m1a</i> | <i>ap2s1</i> | <i>ldlrpab</i> | <i>numb</i> |
|--------------------|----------------|--------------|--------------|---------------|--------------|----------------|-------------|
| <b>Third week</b>  | #1             | 75           | 91           | 383           | 365          | 7              | 19          |
|                    | #2             | 60           | 54           | 346           | 318          | 6              | 15          |
|                    | #3             | 73           | 98           | 360           | 368          | 7              | 19          |
|                    | <b>Average</b> | <b>69</b>    | <b>81</b>    | <b>363</b>    | <b>350</b>   | <b>7</b>       | <b>18</b>   |
| <b>Fourth week</b> | #1             | 78           | 84           | 349           | 359          | 8              | 17          |
|                    | #2             | 89           | 83           | 374           | 370          | 8              | 15          |
|                    | #3             | 82           | 85           | 385           | 371          | 6              | 13          |
|                    | <b>Average</b> | <b>83</b>    | <b>84</b>    | <b>369</b>    | <b>367</b>   | <b>7</b>       | <b>15</b>   |

61 **Table S2. The TPM values for endocytic adaptor genes in the RNA-seq analysis.**

|                    |                | <i>clta</i> | <i>cltb</i> | <i>cltc</i> | <i>cav2</i> | <i>cav3</i> | <i>flot1b</i> | <i>flot2a</i> |
|--------------------|----------------|-------------|-------------|-------------|-------------|-------------|---------------|---------------|
| <b>Third week</b>  | #1             | 851         | 67          | 337         | 1           | 0           | 229           | 91            |
|                    | #2             | 680         | 76          | 209         | 0           | 0           | 196           | 50            |
|                    | #3             | 744         | 73          | 308         | 2           | 0           | 221           | 89            |
|                    | <b>Average</b> | <b>758</b>  | <b>72</b>   | <b>285</b>  | <b>1</b>    | <b>0</b>    | <b>215</b>    | <b>77</b>     |
| <b>Fourth week</b> | #1             | 664         | 97          | 328         | 4           | 0           | 228           | 228           |
|                    | #2             | 739         | 127         | 366         | 2           | 0           | 238           | 238           |
|                    | #3             | 817         | 104         | 343         | 3           | 0           | 234           | 234           |
|                    | <b>Average</b> | <b>740</b>  | <b>109</b>  | <b>346</b>  | <b>3</b>    | <b>0</b>    | <b>233</b>    | <b>233</b>    |

62 **Table S3. The TPM values for vesicle coating protein genes in the RNA-seq analysis.**

|                    |                | <i>ctsa</i> | <i>ctsb</i> | <i>ctsc</i> | <i>ctsh</i> | <i>ctsk</i> | <i>ctsla</i> | <i>ctsl.1</i> | <i>ctso</i> | <i>ctss2.1</i> | <i>ctsz</i> |
|--------------------|----------------|-------------|-------------|-------------|-------------|-------------|--------------|---------------|-------------|----------------|-------------|
|                    | #1             | 862         | 474         | 1867        | 52          | 11          | 831          | 12749         | 3           | 2144           | 66          |
|                    | #2             | 691         | 234         | 1113        | 31          | 17          | 736          | 8412          | 5           | 1656           | 63          |
| <b>Third week</b>  | #3             | 939         | 429         | 1907        | 52          | 14          | 939          | 11227         | 7           | 2042           | 63          |
|                    | <b>Average</b> | <b>831</b>  | <b>379</b>  | <b>1629</b> | <b>45</b>   | <b>14</b>   | <b>835</b>   | <b>10796</b>  | <b>5</b>    | <b>1947</b>    | <b>64</b>   |
|                    | #1             | 751         | 2686        | 2273        | 47          | 24          | 960          | 17795         | 6           | 2494           | 530         |
|                    | #2             | 749         | 2559        | 2320        | 55          | 24          | 809          | 18334         | 7           | 2500           | 551         |
| <b>Fourth week</b> | #3             | 720         | 1944        | 1884        | 48          | 18          | 924          | 15906         | 8           | 2342           | 523         |
|                    | <b>Average</b> | <b>740</b>  | <b>2396</b> | <b>2159</b> | <b>50</b>   | <b>22</b>   | <b>898</b>   | <b>17345</b>  | <b>7</b>    | <b>2445</b>    | <b>535</b>  |

63 **Table S4.** The TPM values for protease genes in the RNA-seq analysis.

|                           |                | 1 h          | 2 h          | 3 h          | 4 h          | 5 h          | 6 h          | 7 h          | 8 h          |
|---------------------------|----------------|--------------|--------------|--------------|--------------|--------------|--------------|--------------|--------------|
| <b>No lysate</b>          | #1             | 68.8         | 67.8         | 67.2         | 65.8         | 65.5         | 65.8         | 65.6         | 65.2         |
|                           | #2             | 66.5         | 65.9         | 64.8         | 62.7         | 64.0         | 64.4         | 63.8         | 62.7         |
|                           | #3             | 66.8         | 65.4         | 69.8         | 63.1         | 63.3         | 62.8         | 61.8         | 62.6         |
|                           | <b>Average</b> | <b>67.4</b>  | <b>66.3</b>  | <b>67.3</b>  | <b>63.8</b>  | <b>64.3</b>  | <b>64.3</b>  | <b>63.8</b>  | <b>63.5</b>  |
| <b>Lysate</b>             | #1             | 260.3        | 345.0        | 437.7        | 530.4        | 579.7        | 637.3        | 699.6        | 694.1        |
|                           | #2             | 264.9        | 351.6        | 460.3        | 551.3        | 617.0        | 678.4        | 727.0        | 748.2        |
|                           | #3             | 256.6        | 339.2        | 441.8        | 522.7        | 587.1        | 642.9        | 692.5        | 720.8        |
|                           | <b>Average</b> | <b>260.6</b> | <b>345.3</b> | <b>446.6</b> | <b>534.8</b> | <b>594.6</b> | <b>652.9</b> | <b>706.3</b> | <b>721.0</b> |
| <b>Lysate + inhibitor</b> | #1             | 94.0         | 96.2         | 98.0         | 99.6         | 101.0        | 106.8        | 104.4        | 101.9        |
|                           | #2             | 88.1         | 88.8         | 91.1         | 91.5         | 93.4         | 94.0         | 98.0         | 98.2         |
|                           | #3             | 88.3         | 88.4         | 89.4         | 93.1         | 94.2         | 96.4         | 99.4         | 101.0        |
|                           | <b>Average</b> | <b>90.1</b>  | <b>91.2</b>  | <b>92.8</b>  | <b>94.7</b>  | <b>96.2</b>  | <b>99.0</b>  | <b>100.6</b> | <b>100.4</b> |

64 **Table S5. The measured fluorescent signal values indicating cathepsin L-dependent proteolysis.**

| Gene           | Accession # |   | Primer sequence (5'-3')   | Related figures |
|----------------|-------------|---|---------------------------|-----------------|
| <i>cubn</i>    | LC595284    | F | ATGGCTGTTACAGTGCAGCCTTCA  | 3A              |
|                |             | R | GGCATGTACATACAGGAATGCTG   |                 |
| <i>amn</i>     | LC595285    | F | TGCCCTTTACAAGCAGTGGATTCC  | 3A              |
|                |             | R | GCGGATTAGCACAAACCACAATCAC |                 |
| <i>lrp2a</i>   | LC595286    | F | ATGTGGAGAACACCGCTGCTTCAA  | 3A              |
|                |             | R | CCACATGGAGCAGTCATCGAAATC  |                 |
| <i>ap2a1</i>   | LC595287    | F | GCTGTGTCGAAGGGAGATGGAATG  | S4              |
|                |             | R | AGAGCTAGATAGCGCAGATTGGTC  |                 |
| <i>ap2b1</i>   | LC595288    | F | GTCATTGCTGCCATGACTGTTGGC  | S4              |
|                |             | R | CCACAATAGCCTCCTGAACCACAT  |                 |
| <i>ap2m1a</i>  | LC595289    | F | GACGTAATGACGGCCTACTTTGGC  | S4              |
|                |             | R | CAGCAGCGGGTTTCATAGATGCCA  |                 |
| <i>ap2s1</i>   | LC595290    | F | ATGATCCGCTTCATCCTCATCCAG  | S4              |
|                |             | R | CTCTAGTGAAGCATGAGGAG      |                 |
| <i>ldlrp1b</i> | LC595291    | F | GGACGCTTTAAAATCCGCTGGAAG  | S4              |
|                |             | R | GCAGCTGAGTCTGTCTCATCTTGG  |                 |
| <i>numb</i>    | LC595296    | F | GAATAAGCTACGGCAGAGCTTCCG  | S4              |
|                |             | R | TTGGGCATTGGAGCGGAAGAGAAC  |                 |
| <i>c1ta</i>    | LC595292    | F | GGATGATTTTGACATGCTGAACGC  | S4              |
|                |             | R | TAACGGACCAGCGGGGACTGCTTT  |                 |
| <i>c1tc</i>    | LC595293    | F | CTCAGATCCTGCCAATTCGCTTTC  | S4              |
|                |             | R | TCTTCTCCACGCAAACAGACAGC   |                 |
| <i>ctsl.1</i>  | LC595294    | F | CAGCATCTCTCTGGAAGATCTCGA  | 4B              |
|                |             | R | CAGACTAGTGGATAACTTGCTGCG  |                 |
| <i>actb</i>    | LC595295    | F | ATGGAAGATGAAATCGCCGCACTG  | 3A, 4B          |
|                |             | R | GAAGCATTACGGTGGACGATGGA   |                 |

65 **Table S6. List of primers used in the study.** F, forward, R, reverse.



| Name                                                               | Immunogen                   | Host   | Supplier   | ID        | Related figures    |
|--------------------------------------------------------------------|-----------------------------|--------|------------|-----------|--------------------|
| CUBN Polyclonal Antibody (anti-Cubn)                               | Human CUBN                  | Rabbit | Invitrogen | PA5-83684 | 3C, 3E, 3G, S2, S3 |
| Rabbit IgG Isotype Control (Control IgG)                           | N/A                         | Rabbit | Invitrogen | 02-6102   | 3C, 3E, 3G, S2, S3 |
| Cubn antiserum (anti-Cubn #2)                                      | <i>Xenotoca eiseni</i> cubn | Mouse  | N/A        | N/A       | S2                 |
| Amn antiserum (anti-Amn)                                           | <i>Xenotoca eiseni</i> amn  | Mouse  | N/A        | N/A       | 3D, S2             |
| Preimmune serum (Control serum)                                    | N/A                         | Mouse  | N/A        | N/A       | 3D, S2             |
| Goat Anti-Mouse IgG (H+L) Secondary Antibody, Alexa Fluor Plus 488 | Rabbit IgG                  | Goat   | Invitrogen | A32723    | 3E, S3             |
| Horse Anti-Mouse IgG Antibody (H+L), Peroxidase                    | Rabbit IgG                  | Horse  | VECTOR     | PI-2000   | 3D, S2             |
| Goat Anti-Rabbit IgG Antibody (H+L), Peroxidase                    | Mouse IgG                   | Goat   | VECTOR     | PI-1000   | 3C, S2             |
| Goat Anti-Rabbit IgG Antibody (H+L), Biotinylated                  | Rabbit IgG                  | Goat   | VECTOR     | BA-1000   | 3G                 |

66 **Table S7. List of antibodies used in the study.**

67 N/A, not applicable.
